# Supplementary material for: The Impact of a Diet Containing Sucrose and Systematically Repeated Starvation on the Oxidative Status of the Uterus and Ovary of Rats
Source: PubMed Central journal article supplement (PMC6682934; doi:10.3390/nu11071544), 2019-07-08
Supplement: nutrients-11-01544-s001.pdf [file nutrients-11-01544-s001.pdf]

**Table S1.** Component composition of diets.

| Component                             | Basic feed | Modified feed |
|---------------------------------------|------------|---------------|
| Wheat (g/100 g)                       | 36.4       | 6.01          |
| Corn grain (g/100 g)                  | 20.0       | 10.0          |
| Wheat bran (g/100 g)                  | 20.0       | 20.0          |
| Dry whey (g/100 g)                    | 3.0        | 3.0           |
| Fodder salt <sup>1</sup> (g/100 g)    | 0.3        | 0.3           |
| Soya-bean grain (g/100 g)             | 17.0       | 17.0          |
| Fodder chalk <sup>2</sup> (g/100 g)   | 1.5        | 1.5           |
| Phosphate 2-CA <sup>3</sup> (g/100 g) | 0.8        | 0.8           |
| Premix LRM <sup>4</sup> (g/100 g)     | 1.0        | 1.0           |
| Wheat flour (g/100 g)                 | 0.0        | 24.4          |
| Sucrose (g/100 g)                     | 0.0        | 16.0          |

<sup>1</sup> Mainly NaCl; <sup>2</sup>- Mainly CaCO<sub>3</sub>; <sup>3</sup>- CaHPO<sub>4</sub>; <sup>4</sup>- Vitamin-mineral composition used in animals feeds content per kg: IU: A 1500000, vit. D3, 100000; mg: vit. E 8000; vit. K 300, vit. B1 1200, vit. B2 1200, vit. B6 1000, vit. B12 8, Se 100, Fe 16000, Mn 4500, Zn 6000, Cu 1300, I 100, Co 200.

**Table S2.** Chemical composition of diets.

| Component            | Basic feed  | Modified feed |
|----------------------|-------------|---------------|
| Total protein (%)    | 17.9±0.09   | 16.9±0.10     |
| % of diet energy     | 21.0        | 19.1          |
| Crude fat (%)        | 3.25±0.11   | 3.56±0.09     |
| % of diet energy     | 8.58        | 9.05          |
| Carbohydrates (%)    |             |               |
| total                | 63.1±0.55   | 65.8±0.48     |
| fiber                | 5.96±0.15   | 4.39±0.13     |
| digested             | 57.1±0.50   | 61.5±0.44     |
| % of diet energy     | 70.4        | 71.8          |
| Dry matter (%)       | 90.8±0.20   | 92.9±0.11     |
| Total ash (%)        | 6.52±0.12   | 6.63±0.18     |
| Metabolizable energy |             |               |
| (kcal/g)             | 3.41±0.03   | 3.54±0.04     |
| (kJ/g)               | 14.2±0.21   | 14.8±0.25     |
| Copper (mg/100 g)    | 1.8±0.09    | 1.4±0.08      |
| Iron (mg/100 g)      | 20.1±0.71   | 15.8±0.068    |
| Manganese (mg/100 g) | 8.0±0.45    | 6.66±0.51     |
| Selenium (mg/100 g)  | 0.037±0.001 | 0.033±0.001   |
| Zinc (mg/100 g)      | 9.25±0.52   | 7.77±0.61     |

**Table S3.** Manufacturers and catalog numbers of reagents used in biochemical tests.

| Assay                       | Manufacturer                          | Catalog number |
|-----------------------------|---------------------------------------|----------------|
| CAT (red blood cell lysate) | Cayman Chemical                       | 707002         |
| CAT (supernatants)          | Shanghai Sunred Biological Technology | 201-11-5106    |
| Estradiol                   | Fine Test Wuchan                      | ER1507         |
| Glucose                     | BioSystems                            | 11503          |
| GPx (red blood cell lysate) | Cayman Chemical                       | 703102         |
| GPx (supernatants)          | Shanghai Sunred Biological Technology | 201-11-1705    |
| Haemoglobin                 | Sigma Aldrich                         | MAK115         |
| HDL-cholesterol             | BioSystems                            | 11557          |
| Insulin                     | Demeditec Diagnostics                 | DE2048         |
| LDL-cholesterol             | BioSystems                            | 11585          |
| MDA (blood plasma)          | Wuhan EIAab Sciences                  | E0597r         |
| MDA (supernatants)          | Shanghai Sunred Biological Technology | 201-11-0157    |
| Protein (supernatants)      | Sigma Aldrich                         | B6916          |
| SOD (red blood cell lysate) | Cayman Chemical                       | 706002         |
| SOD (supernatants)          | Shanghai Sunred Biological Technology | 201-11-0169    |
| Total cholesterol           | BioSystems                            | 11805          |
| Triglycerides               | BioSystems                            | 11828          |

CAT - catalase, GPx - glutathione peroxidase, MDA - malonyldialdehyde, SOD - superoxide dismutase
